# Supplementary material for: Oxo transition metal anchored on C3N4 with constructing a high-activity bifunctional electrocatalyst for rechargeable metal–air batteries
Source: Royal Society of Chemistry journal article supplement (doi:10.1039/d3cp02382f), 2023-01-01
Supplement: d3cp02382f1.pdf [file d3cp02382f1.pdf]

## Supplementary Material

### **Oxo transition metal anchored on C<sub>3</sub>N<sub>4</sub> with constructing high-activity bifunctional electrocatalyst for rechargeable metal–air batteries**

Yahui Li <sup>a</sup>, Xiuyun Zhao <sup>b</sup>, Xin Chen <sup>\*a</sup>

<sup>a</sup> *Center for Computational Chemistry and Molecular Simulation, College of Chemistry and Chemical Engineering, Southwest Petroleum University, Chengdu 610500, China*

<sup>b</sup> *Department of Technical Physics, University of Eastern Finland, Kuopio 70211, Finland*

---

\* Corresponding author.

*E-mail address:* chenxin830107@pku.edu.cn

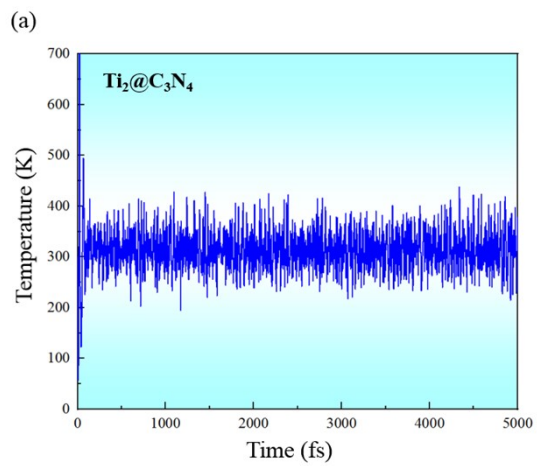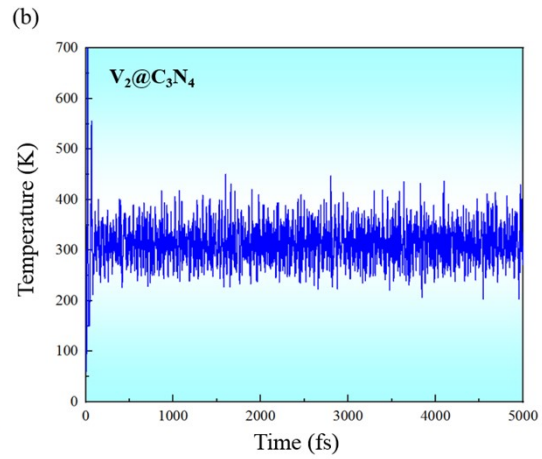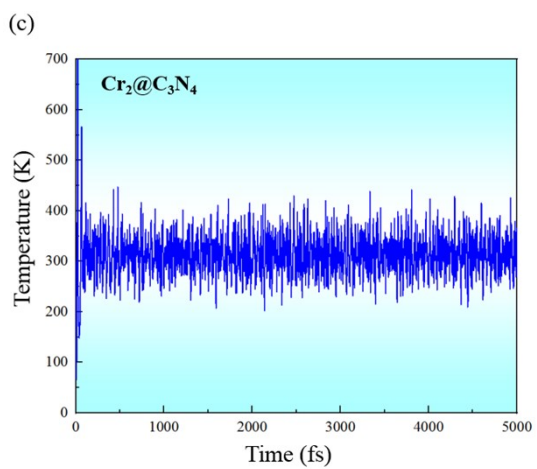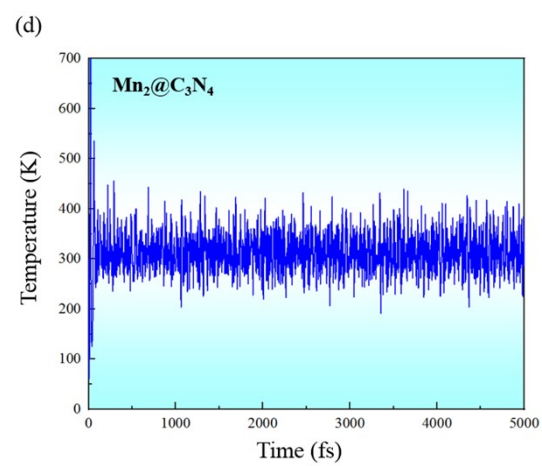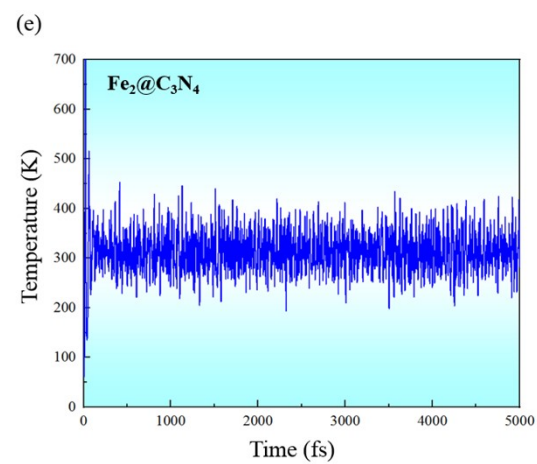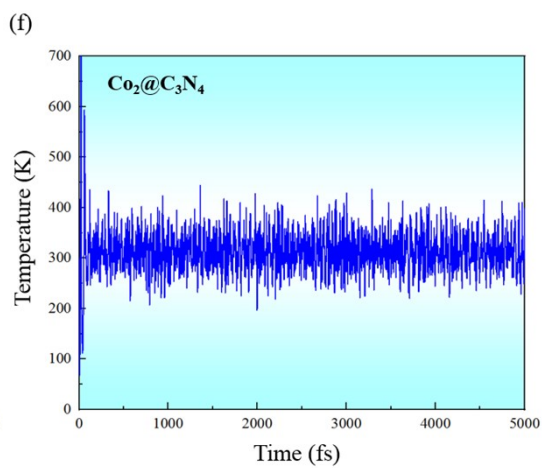

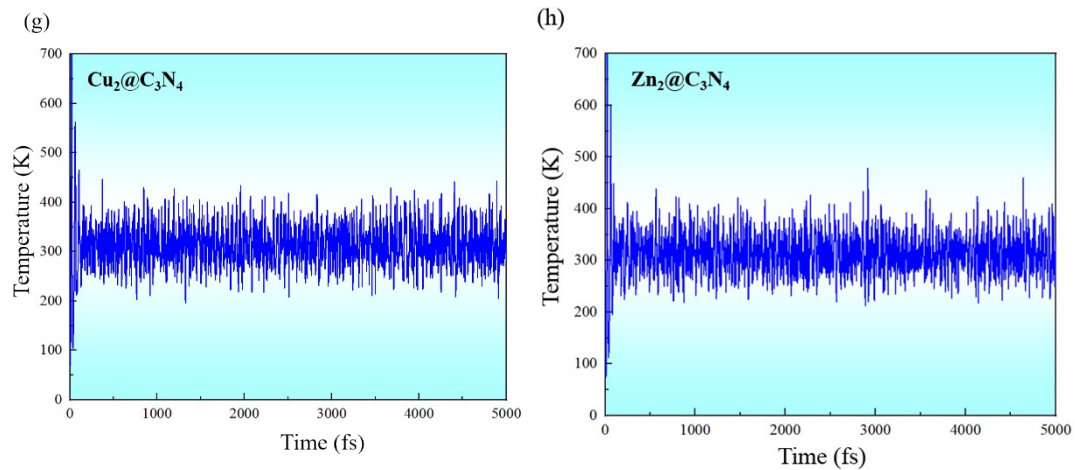

**Fig. S1.** FPMD of (a)Ti<sub>2</sub>@C<sub>3</sub>N<sub>4</sub>, (b)V<sub>2</sub>@C<sub>3</sub>N<sub>4</sub>, (c)Cr<sub>2</sub>@C<sub>3</sub>N<sub>4</sub>, (d)Mn<sub>2</sub>@C<sub>3</sub>N<sub>4</sub>, (e)Fe<sub>2</sub>@C<sub>3</sub>N<sub>4</sub>, (f)Co<sub>2</sub>@C<sub>3</sub>N<sub>4</sub>, (g)Cu<sub>2</sub>@C<sub>3</sub>N<sub>4</sub>, and (h)Zn<sub>2</sub>@C<sub>3</sub>N<sub>4</sub>.

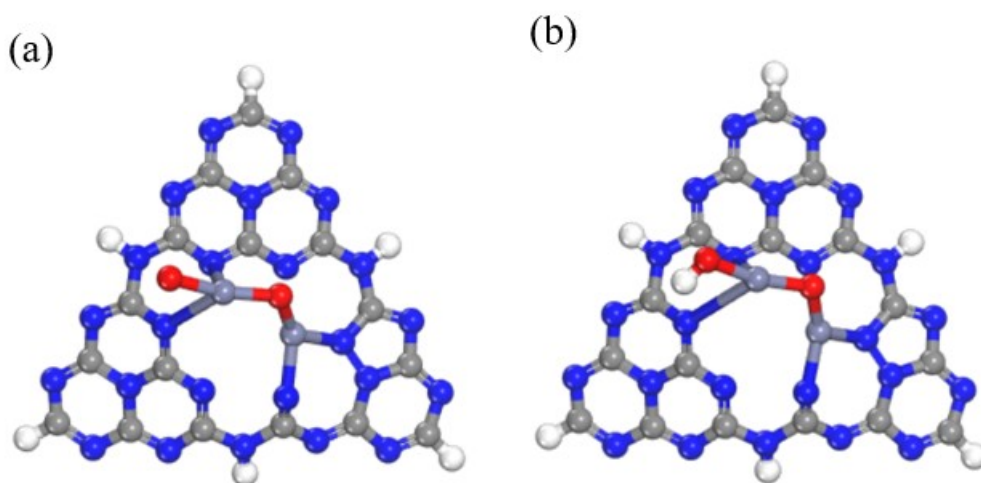

**Fig. S2.** Configurations of (a) \*O and (b) \*OH adsorbed at  $\beta$  site on Zn<sub>2</sub>@C<sub>3</sub>N<sub>4</sub>.

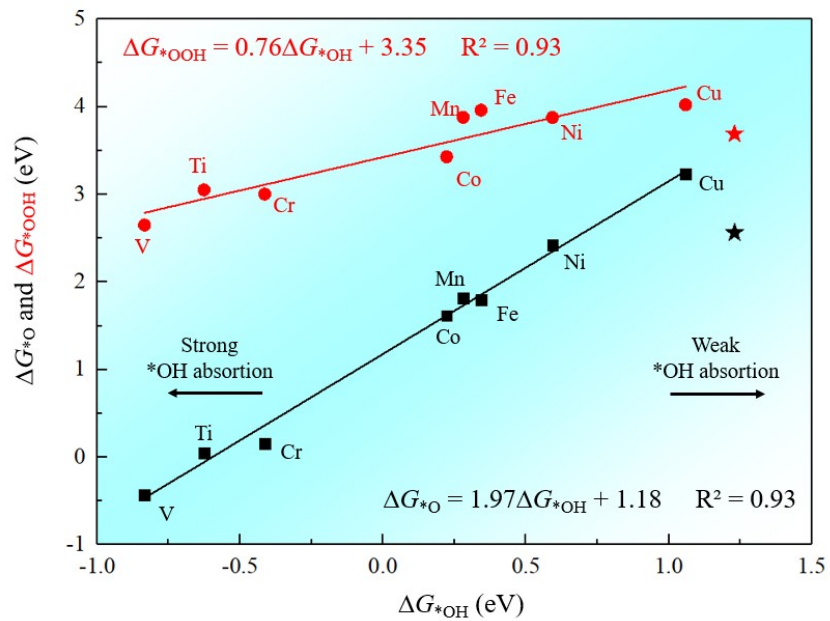

**Fig. S3.** Scaling relationships of  $\Delta G_{*OH}$  with  $\Delta G_{*OOH}$  and  $\Delta G_{*O}$  at  $\beta$  site on  $M_2@C_3N_4$ .

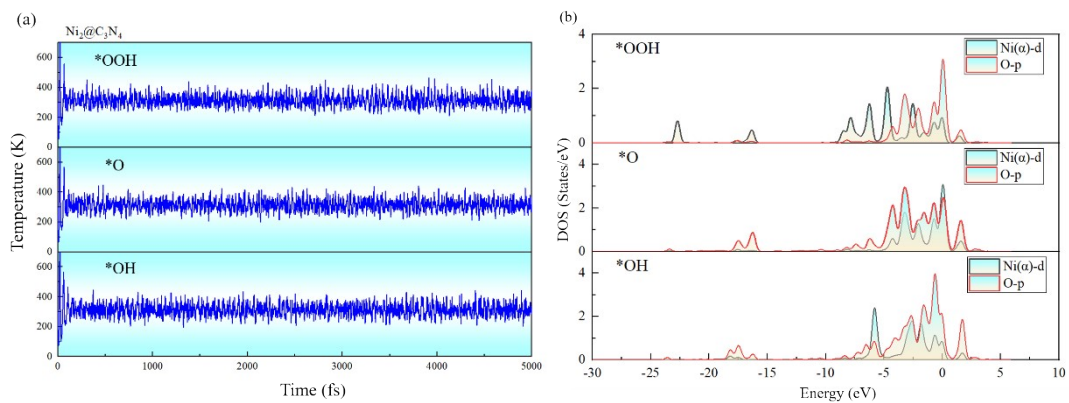

**Fi**

**g. S4** (a) FPMD of \*OOH, \*O, and \*OH at  $\alpha$  site on  $\text{Ni}_2@C_3N_4$ . (b) DOS of \*OOH, \*O, and \*OH at  $\alpha$  site on  $\text{Ni}_2@C_3N_4$ . O-p orbitals represents the p orbital of O atom on \*OOH, \*O, or \*OH directly connected to Ni( $\alpha$ ) for  $\text{Ni}_2@C_3N_4$ .

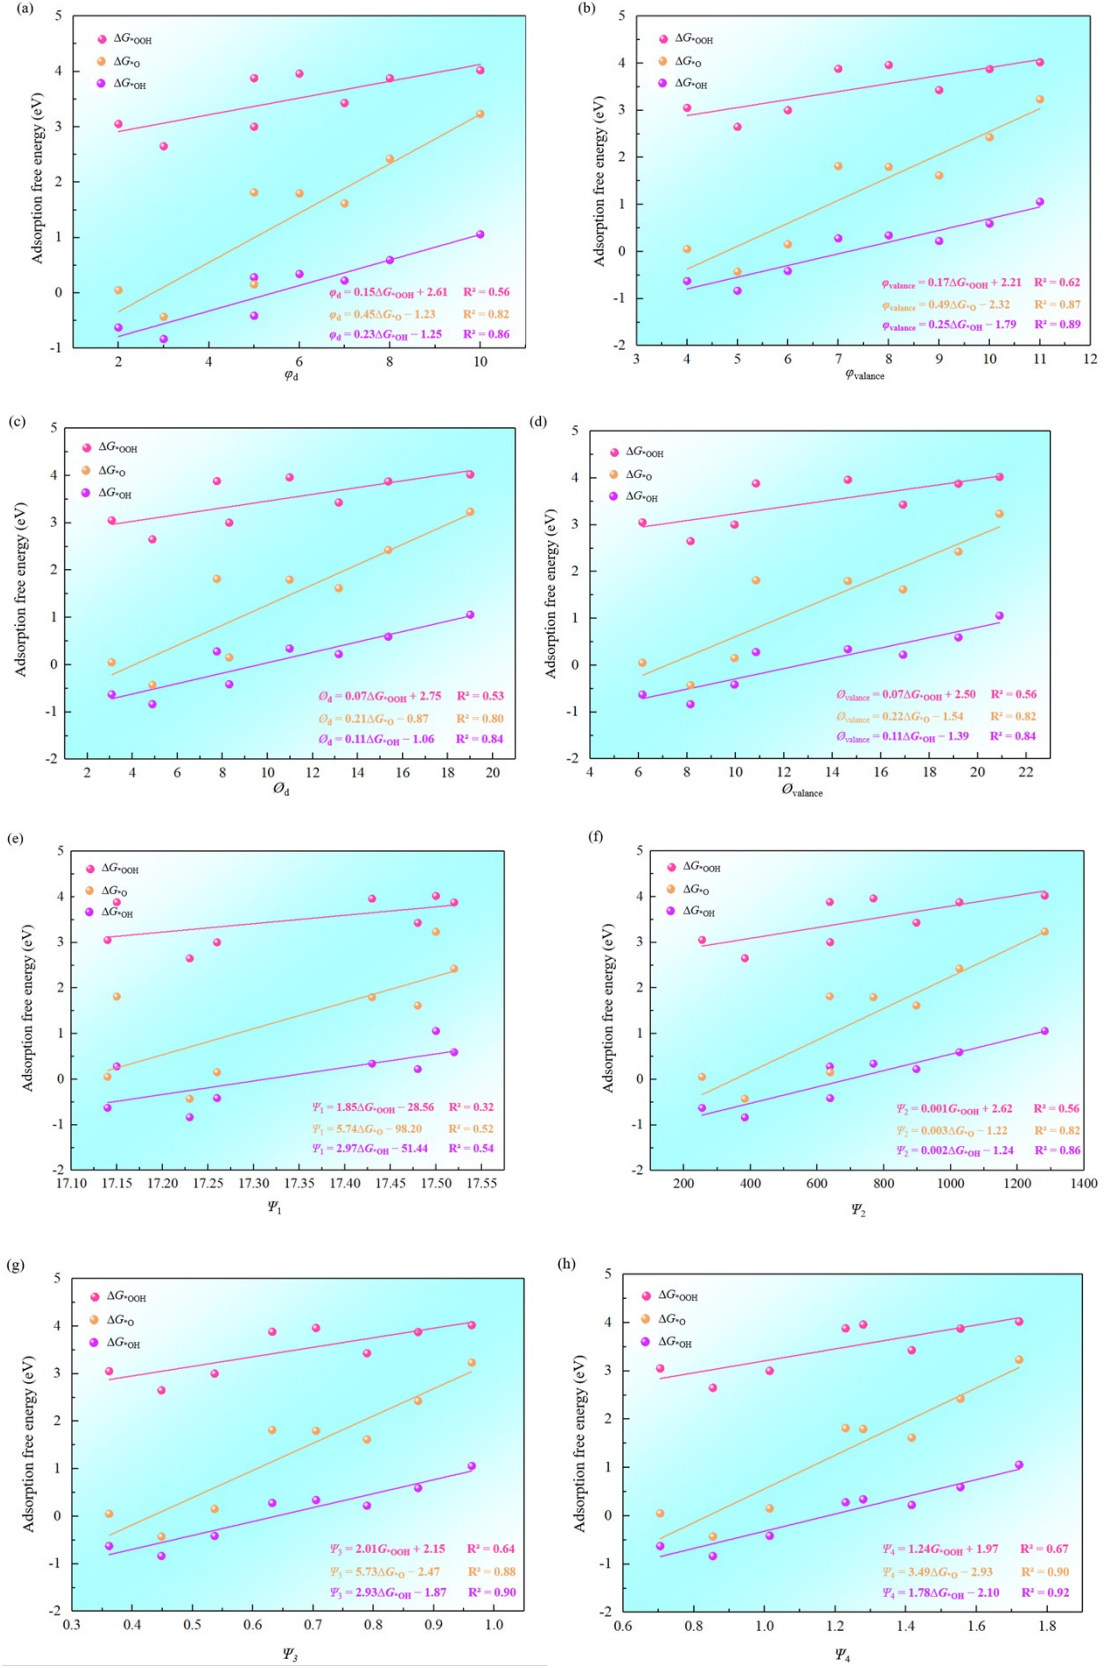

**Fig. S5.** Relationship of  $\Delta G_{\text{species}}$  with (a) the  $\phi_d$ , (b)  $\phi_{\text{valence}}$ , (c)  $\theta_d$ , (d)  $\theta_{\text{valence}}$ , (e)  $\Psi_1$ , (f)  $\Psi_2$ , (g)  $\Psi_3$ , and (h)  $\Psi_4$  at  $\alpha$  site  $\beta$  site on  $\text{M}_2@\text{C}_3\text{N}_4$ .

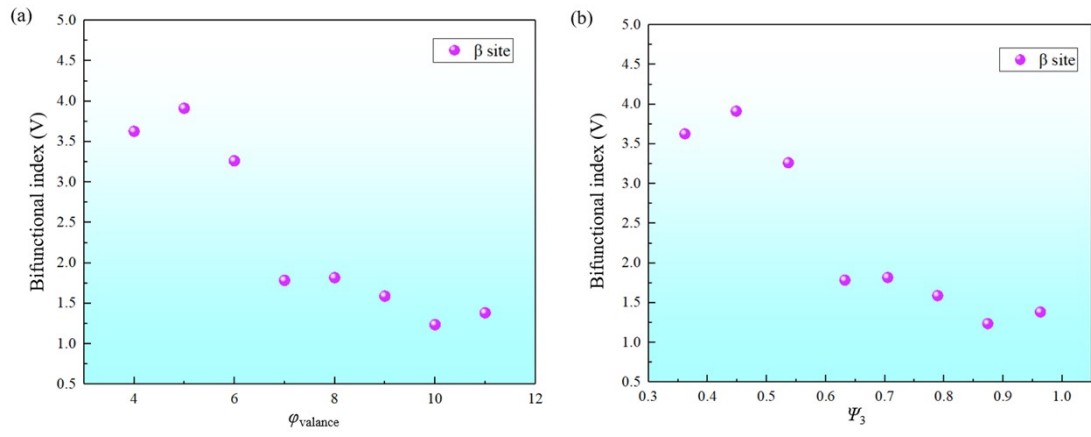

**Fig. S6.** (a)  $\phi_{\text{valence}}$  and (b)  $\Psi_3$  versus bifunctional index at  $\beta$  site on  $M_2@C_3N_4$ .

**Table S1** ICOHP of Cu( $\alpha$ )-O, Cu( $\beta$ )-O, Cu( $\alpha$ )-N1, Cu( $\alpha$ )-N2, Cu( $\beta$ )-N3, Cu( $\beta$ )-N4 in Cu<sub>2</sub>@C<sub>3</sub>N<sub>4</sub>.

| Bonds             | ICOHP (eV) |
|-------------------|------------|
| Cu( $\alpha$ )-O  | -1.31      |
| Cu( $\beta$ )-O   | -1.40      |
| Cu( $\alpha$ )-N1 | -1.59      |
| Cu( $\alpha$ )-N2 | -2.65      |
| Cu( $\beta$ )-N3  | -0.67      |
| Cu( $\beta$ )-N4  | -2.04      |



**Table S2** Adsorption energy ( $E_{\text{ads}}$ , eV) of the O<sub>2</sub> molecule on M<sub>2</sub>@C<sub>3</sub>N<sub>4</sub>.

|                                                |               | end-on | side-on |
|------------------------------------------------|---------------|--------|---------|
| Ti <sub>2</sub> @C <sub>3</sub> N <sub>4</sub> | $\alpha$ site | -2.03  | -3.48   |
|                                                | $\beta$ site  | -2.45  | -2.45   |
| V <sub>2</sub> @C <sub>3</sub> N <sub>4</sub>  | $\alpha$ site | -2.45  | -3.33   |
|                                                | $\beta$ site  | -2.84  | -2.24   |
| Cr <sub>2</sub> @C <sub>3</sub> N <sub>4</sub> | $\alpha$ site | -1.75  | -2.44   |
|                                                | $\beta$ site  | -1.40  | -1.98   |
| Mn <sub>2</sub> @C <sub>3</sub> N <sub>4</sub> | $\alpha$ site | -1.56  | -1.56   |
|                                                | $\beta$ site  | -1.08  | -1.08   |
| Fe <sub>2</sub> @C <sub>3</sub> N <sub>4</sub> | $\alpha$ site | -0.35  | -1.24   |
|                                                | $\beta$ site  | -0.53  | -0.97   |
| Co <sub>2</sub> @C <sub>3</sub> N <sub>4</sub> | $\alpha$ site | -0.80  | -1.32   |
|                                                | $\beta$ site  | -0.84  | -0.84   |
| Ni <sub>2</sub> @C <sub>3</sub> N <sub>4</sub> | $\alpha$ site | -0.10  | -0.58   |
|                                                | $\beta$ site  | -0.54  | -0.68   |
| Cu <sub>2</sub> @C <sub>3</sub> N <sub>4</sub> | $\alpha$ site | -0.53  | -0.53   |
|                                                | $\beta$ site  | -0.33  | -0.37   |
| Zn <sub>2</sub> @C <sub>3</sub> N <sub>4</sub> | $\alpha$ site | —      | -0.42   |
|                                                | $\beta$ site  | —      | -0.35   |
